# Supplementary material for: Probing the Interoceptive Network by Listening to Heartbeats: An fMRI Study
Source: PLoS One. 2015 Jul 23;10(7):e0133164. doi: 10.1371/journal.pone.0133164 (PMC4512728; doi:10.1371/journal.pone.0133164)
Supplement: S1 Table — (DOC) [file pone.0133164.s001.doc]

**S1 Table. Neurofunctional activation during the heartbeat task as revealed by a second-level random effects analysis (full factorial design with factors “stimulus type” and “frequency”), whole brain analysis.**

|  | Location | Side | MNI Coordinates  (x, y, z) | | | F-/t-value | p uncorr. | cluster size |
| --- | --- | --- | --- | --- | --- | --- | --- | --- |
| Main effect of stimulus type (F-contrast) | Middle frontal gyrus | R | 42 | 39 | 3 | 25.25 | <0.001 | 189 |
| Inferior frontal operculum1 | R | 36 | 0 | 27 | 18.26 | <0.001 | 90 |
| Inferior frontal gyrus triangularis | L | -42 | 24 | 6 | 17.04 | <0.001 | 13 |
| Superior parietal gyrus | R | 39 | -57 | 57 | 15.66 | <0.001 | 14 |
| Angular gyrus | R | 45 | -51 | 33 | 15.42 | <0.001 | 35 |
| Middle frontal gyrus | R | 45 | 3 | 54 | 14.44 | <0.001 | 12 |
| Supplementary motor area | R | 9 | 21 | 45 | 14.42 | <0.001 | 12 |
| Superior medial frontal gyrus | R | 6 | 33 | 39 | 13.96 | <0.001 | 14 |
| Cerebellum | L | -39 | -72 | -30 | 12.27 | <0.001 | 13 |
| t-contrast heart > tone | Middle frontal gyrus | R | 42 | 39 | 3 | 5.03 | <0.001 | 224 |
| Inferior frontal operculum1 | R | 36 | 0 | 27 | 4.27 | <0.001 | 137 |
| Inferior frontal gyrus triangularis | L | -42 | 24 | 6 | 4.13 | <0.001 | 25 |
| Superior medial frontal gyrus | R | 9 | 48 | 39 | 4.01 | <0.001 | 104 |
| Superior parietal gyrus | R | 39 | -57 | 57 | 3.96 | <0.001 | 104 |
| Caudate nucleus3 | R | 15 | -3 | 24 | 3.84 | <0.001 | 10 |
| Inferior frontal gyrus triangularis | L | -33 | 39 | 9 | 3.80 | <0.001 | 27 |
| Middle frontal gyrus | R | 45 | 3 | 54 | 3.80 | <0.001 | 28 |
| Cerebellum | L | -30 | -78 | -42 | 3.78 | <0.001 | 17 |
| Cerebellum | L | -39 | -72 | -30 | 3.73 | <0.001 | 36 |
|  |  |  |  |  |  |  |  |  |
| t-contrast tone > heart | *no significant activation* |  |  |  |  |  |  |  |
|  |  |  |  |  |  |  |  |  |
| Main effect of frequency (F-contrast) | Cerebellum | R | 21 | -60 | -21 | 20.11 | <0.001 | 57 |
| Precentral gyrus | L | -51 | -6 | 48 | 16.59 | <0.001 | 26 |
| Supplementary motor area | L | -3 | 3 | 60 | 14.19 | <0.001 | 10 |
| Precentral gyrus | L | -57 | 0 | 33 | 13.68 | <0.001 | 10 |
| t-contrast 100 > 50 | Cerebellum | R | 21 | -60 | -21 | 4.48 | <0.001 | 104 |
| Precentral gyrus | L | -51 | -6 | 48 | 4.07 | <0.001 | 68 |
| Supplementary motor area | L | -3 | 3 | 60 | 3.77 | <0.001 | 16 |
|  | Rolandic operculum | L | -48 | 6 | 3 | 3.51 | <0.001 | 27 |
|  |  |  |  |  |  |  |  |  |
| t-contrast 50 > 100 | Paracentral Lobule | L | -6 | -27 | 63 | 3.59 | <0.001 | 13 |
|  |  |  |  |  |  |  |  |  |
| Interaction effect of stimulus type and frequency (F-contrast) | Insula2 | L | -30 | -27 | 24 | 27.11 | <0.001 | 32 |
|  |  |  |  |  |  |  |  |  |
| t-contrast H50 > H100 | Paracentral Lobule | L | -9 | -21 | 66 | 3.53 | <0.001 | 19 |
|  |  |  |  |  |  |  |  |  |
| t-contrast H100 > H50 | Cerebellum | R | 21 | -60 | -24 | 3.86 | <0.001 | 11 |
|  |  |  |  |  |  |  |  |  |
| t-contrast T50 > T100 | *no significant activation* |  |  |  |  |  |  |  |
|  |  |  |  |  |  |  |  |  |
| t-contrast T100 > T50 | Insula2 | L | -30 | -27 | 24 | 4.26 | <0.001 | 42 |
| Fusiform gyrus | R | 33 | -75 | 0 | 4.06 | <0.001 | 12 |
| Precentral gyrus | L | -51 | -6 | 48 | 3.66 | <0.001 | 12 |
| Precentral gyrus | L | -54 | 0 | 33 | 3.36 | <0.001 | 15 |

*Note.* L = left; R = right; H50= resting heartbeat; H100= accelerated heartbeat; T50 = resting tone; T100 = accelerated tone; 1peak voxel with 2.24 mm distance to the inferior frontal operculum. 2Peak voxel with 2.24 mm distance to the insula. 3Peak voxel with 1.41 mm distance to the caudate nucleus. 4Peak voxel with 1.41 mm distance to the insula. 5Peak voxel with 5.48 mm distance to the insula. 6Peak voxel with 7.35 mm distance to the precentral gyrus. 7Peak voxel with 2.45 mm distance to the anterior cingulate cortex. 8Peak voxel with 3.00 mm distance to the pallidum. 9Peak voxel with 2.24 mm distance to the inferior parietal gyrus. Analyses are reported at p < 0.001 uncorrected with a minimum cluster size of 10 contiguous voxels.
